# Supplementary material for: Synthesis and Characterization of Benzene- and Triazine-Based Azo-Bridged Porous Organic Polymers
Source: MDPI journal article supplement (doi:10.3390/polym15010229), 2023-01-01
Supplement: s1 [file s1]

## Supplementary Materials

### Contents

|                                                       |    |
|-------------------------------------------------------|----|
| Contents .....                                        | 1  |
| 1. General synthetic procedures .....                 | 2  |
| 1.1. Synthesis of AZO-B-P1–AZO-T-P14 .....            | 3  |
| 2. FT-IR spectra .....                                | 8  |
| 3. $^{13}\text{C}$ CP/MAS NMR spectra .....           | 9  |
| 4. Powder X-ray diffraction .....                     | 13 |
| 5. Thermogravimetric analysis.....                    | 14 |
| 6. Computational studies of azo-bridged polymers..... | 20 |

# 1. General synthetic procedures

Azo-bridged polymers were synthesized by three different methods: (a) reductive homocoupling of aromatic nitro compounds (TNPB and TNPT) using Zn or NaBH<sub>4</sub> as reducing agent (AZO-B-P1 and AZO-T-P2); (b) oxidative homocoupling of aromatic amino compound (TAPT) with CuBr as an oxidizing agent (AZO-T-P3), (c) condensation reactions of various aromatic nitro compounds and various aromatic diamines under basic conditions (AZO-B-P4 – AZO-T-P14). All diamines, 1,4-phenylenediamine (PPD), benzidine (BZD), 4,4'-diaminodiphenylmethane, 4,4'-oxydianiline, 4,4'-ethylenedianiline, 4,4'-diaminobenzophenone and 4,4'-diaminodiphenyl sulfide, were purchased from the suppliers. 1,3,5-Tris(4-nitrophenyl)benzene (TNPB)<sup>1</sup>, 2,4,6-tris(4-nitrophenyl)-1,3,5-triazine (TNPT)<sup>2</sup> and 2,4,6-tris(4-aminophenyl)-1,3,5-triazine (TAPT)<sup>2</sup> were synthesized by the procedure described in the literature.

1,3,5-Tris(4-nitrophenyl)benzene (TNPB): Yield 77 %.

IR (ATR)  $\tilde{\nu}$  / cm<sup>-1</sup>: 1663, 1592, 1508, 1341, 1105, 841, 748, 689.

<sup>13</sup>C CP/MAS NMR (400 MHz)  $\delta$  / ppm: 145.7, 138.6, 129.9, 127.8, 125.8, 121.8.

2,4,6-Tris(4-nitrophenyl)-1,3,5-triazine (TNPT): Yield 85 %.

IR (ATR)  $\tilde{\nu}$  / cm<sup>-1</sup>: 1531, 1414, 1334, 1105, 1010, 824, 743, 684.

<sup>13</sup>C CP/MAS NMR (400 MHz)  $\delta$  / ppm: 169.3, 149.8, 140.0, 131.0, 123.2.

2,4,6-Tris(4-aminophenyl)-1,3,5-triazine (TAPT): Yield 76 %.

IR (ATR)  $\tilde{\nu}$  / cm<sup>-1</sup>: 3460, 3319, 3208, 1604, 1493, 1428, 1362, 1177, 1147, 1128, 811, 722, 676.

<sup>1</sup>H NMR (400 MHz, DMSO-d<sub>6</sub>)  $\delta$  / ppm: 8.35 (d, 6H, *J* = 8.6 Hz), 6.68 (d, 6H, *J* = 8.6 Hz), 5.90 (s, 6H).

<sup>13</sup>C NMR (100 MHz, DMSO-d<sub>6</sub>)  $\delta$  / ppm: 170.0, 153.4, 130.6, 123.3, 113.5.

---

<sup>1</sup> Li, G.; Wang, Z. Microporous Polyimides with Uniform Pores for Adsorption and Separation of CO<sub>2</sub> Gas and Organic Vapors. *Macromolecules* **2013**, *46*, 3058–3066.

<sup>2</sup> Halder, A.; Kandambeth, S.; Biswal, B.P.; Kaur, G.; Roy, N.C.; Addicoat, M.; Salunke, J.K.; Banerjee, S.; Vanka, K.; Heine, T.; Verma, S.; Banerjee, R. Decoding the Morphological Diversity in Two Dimensional Crystalline Porous Polymers by Core Planarity Modulation. *Angew. Chem. Int. Ed.* **2016**, *55*, 7806–7810.

## 1.1. Synthesis of AZO-B-P1 – AZO-T-P14

### Synthesis of AZO-B-P1

Yield 50 %.

IR (ATR)  $\tilde{\nu}$  /  $\text{cm}^{-1}$ : 3356, 1593, 1509, 1448, 1392, 1346, 841.

$^{13}\text{C}$  CP/MAS NMR (400 MHz)  $\delta$  / ppm: 151.9, 142.7, 127.7, 123.3.

Elemental Analysis: 69.93 %C (calc. 83.46), 10.14 %N (calc. 12.17).

### Synthesis of AZO-T-P2

Yield 37 %.

IR (ATR)  $\tilde{\nu}$  /  $\text{cm}^{-1}$ : 3384, 1584, 1509, 1437, 1410, 1359, 819.

$^{13}\text{C}$  CP/MAS NMR (400 MHz)  $\delta$  / ppm: 170.0, 154.3, 137.8, 122.7.

Elemental Analysis: 70.55 %C (calc. 72.40), 22.95 %N (calc. 24.12).

### Synthesis of AZO-T-P3

Yield 52 %.

IR (ATR)  $\tilde{\nu}$  /  $\text{cm}^{-1}$ : 3353, 1583, 1504, 1435, 1409, 1359, 816.

$^{13}\text{C}$  CP/MAS NMR (400 MHz)  $\delta$  / ppm: 170.0, 154.0, 137.9, 122.7, 114.1.

Elemental Analysis: 60.72 %C (calc. 72.40), 18.84 %N (calc. 24.12).

### Synthesis of AZO-B-P4

Yield 78 %.

IR (ATR)  $\tilde{\nu}$  /  $\text{cm}^{-1}$ : 3356, 1591, 1509, 1446, 1390, 1342, 1106, 841, 748, 690.

$^{13}\text{C}$  CP/MAS NMR (400 MHz)  $\delta$  / ppm: 151.7, 146.6, 128.0, 123.1, 115.3.

Elemental Analysis: 57.84 %C (calc. 80.16), 9.59 %N (calc. 15.58).

### Synthesis of AZO-T-P5

AZO-T-P5 was synthesized by the similar procedure described in the literature.<sup>3</sup> TNPT (500 mg, 1.13 mmol), 1,4-phenylenediamine (184 mg, 1.70 mmol), DMF (50 mL) and KOH (634 mg, 11.3 mmol) were added in double-necked flask and heated to reflux under N<sub>2</sub> atmosphere. After 24 h, the reaction mixture was cooled to room temperature, poured in 300 mL of distilled water and stirred for 1 h. The reaction mixture was filtered off and washed with hot distilled water, acetone and THF. After drying at 140 °C under vacuum for 5 h, black solid was obtained (360 mg, yield 70 %).

IR (ATR)  $\tilde{\nu}$  / cm<sup>-1</sup>: 3376, 1583, 1492, 1406, 1356, 1336, 811.

<sup>13</sup>C CP/MAS NMR (600 MHz)  $\delta$  / ppm: 169.0, 153.0, 149.5, 137.6, 128.6, 122.5, 115.1.

Elemental Analysis: 67.64 %C (calc. 71.67), 20.04 %N (calc. 24.76).

### Synthesis of AZO-B-P6

AZO-B-P6 was synthesized by the similar procedure described in the literature.<sup>3</sup> TNPB (500 mg, 1.13 mmol), benzidine (313 mg, 1.70 mmol), DMF (50 mL) and KOH (634 mg, 11.3 mmol) were added in double-necked flask and heated to reflux under N<sub>2</sub> atmosphere. After 24 h, the reaction mixture was cooled to room temperature, poured in 300 mL of distilled water and stirred for 1 h. The reaction mixture was filtered off and washed with hot distilled water, acetone and THF. After drying at 140 °C under vacuum for 5 h, black solid was obtained (242 mg, yield 41 %).

IR (ATR)  $\tilde{\nu}$  / cm<sup>-1</sup>: 3361, 3030, 1590, 1513, 1441, 1388, 1342, 833.

<sup>13</sup>C CP/MAS NMR (400 MHz)  $\delta$  / ppm: 151.5, 146.3, 141.6, 127.6, 115.5.

Elemental Analysis: 71.26 %C (calc. 82.26), 10.35 %N (calc. 13.32).

### Synthesis of AZO-B-P7

AZO-B-P7 was synthesized by the similar procedure described in the literature.<sup>3</sup> TNPB (500 mg, 1.13 mmol), 4,4'-diaminodiphenylmethane (340 mg, 1.70 mmol), DMF (50 mL) and KOH (634 mg, 11.3 mmol) were added in double-necked flask and heated to reflux under N<sub>2</sub> atmosphere. After 24 h, the reaction mixture was cooled to room temperature, poured in 300 mL of distilled water and stirred for 1 h. The reaction mixture was filtered off and washed with hot distilled water, acetone and THF. After drying at 140 °C under vacuum for 5 h, black solid was obtained (175 mg, yield 29 %).

IR (ATR)  $\tilde{\nu}$  / cm<sup>-1</sup>: 3358, 1590, 1510, 1443, 1388, 1341, 832.

---

<sup>3</sup> Patel, H.A.; Je, S.H.; Park, J.; Jung, Y.; Coskun, A.; Yavuz, C.T. Directing the Structural Features of N<sub>2</sub>-Phobic Nanoporous Covalent Organic Polymers for CO<sub>2</sub> Capture and Separation. *Chem. Eur. J.* **2014**, *20*, 772–780.

$^{13}\text{C}$  CP/MAS NMR (400 MHz)  $\delta$  / ppm: 151.5, 146.4, 141.6, 128.5, 123.8, 115.4, 40.1.

Elemental Analysis: 71.88 %C (calc. 82.35), 10.46 %N (calc. 12.98).

### Synthesis of AZO-B-P8

AZO-B-P8 was synthesized by the similar procedure described in the literature.<sup>3</sup> TNPB (500 mg, 1.13 mmol), 4,4'-oxydianiline (343 mg, 1.70 mmol), DMF (50 mL) and KOH (634 mg, 11.3 mmol) were added in double-necked flask and heated to reflux under  $\text{N}_2$  atmosphere. After 24 h, the reaction mixture was cooled to room temperature, poured in 300 mL of distilled water and stirred for 1 h. The reaction mixture was filtered off and washed with hot distilled water, acetone and THF. After drying at 140 °C under vacuum for 5 h, black solid was obtained (430 mg, yield 70 %).

IR (ATR)  $\tilde{\nu}$  /  $\text{cm}^{-1}$ : 3353, 1590, 1494, 1444, 1390, 1341, 827.

$^{13}\text{C}$  CP/MAS NMR (400 MHz)  $\delta$  / ppm: 151.9, 146.5, 142.8, 127.6, 123.3, 115.8.

Elemental Analysis: 70.55 %C (calc. 79.83), 11.12 %N (calc. 12.93).

### Synthesis of AZO-B-P9

AZO-B-P9 was synthesized by the similar procedure described in the literature.<sup>3</sup> TNPB (500 mg, 1.13 mmol), 4,4'-ethylenedianiline (361 mg, 1.70 mmol), DMF (50 mL) and KOH (634 mg, 11.3 mmol) were added in double-necked flask and heated to reflux under  $\text{N}_2$  atmosphere. After 24 h, the reaction mixture was cooled to room temperature, poured in 300 mL of distilled water and stirred for 1 h. The reaction mixture was filtered off and washed with hot distilled water, acetone and THF. After drying at 140 °C under vacuum for 5 h, black solid was obtained (384 mg, 61 %).

IR (ATR)  $\tilde{\nu}$  /  $\text{cm}^{-1}$ : 3359, 2923, 2851, 1590, 1512, 1441, 1390, 1342, 825.

$^{13}\text{C}$  CP/MAS NMR (400 MHz)  $\delta$  / ppm: 151.7, 146.5, 141.2, 128.4, 123.8, 115.3, 37.0.

Elemental Analysis: 72.44% C (calc. 82.44), 10.64 %N (calc. 12.65).

### Synthesis of AZO-B-P10

AZO-B-P10 was synthesized by the similar procedure described in the literature.<sup>3</sup> TNPB (500 mg, 1.13 mmol), 4,4'-diaminobenzophenone (364 mg, 1.70 mmol), DMF (50 mL) and KOH (634 mg, 11.3 mmol) were added in double-necked flask and heated to reflux under  $\text{N}_2$  atmosphere. After 24 h, the reaction mixture was cooled to room temperature, poured in 300 mL of distilled water and stirred for 1 h. The reaction mixture was filtered off and washed with hot distilled water, acetone and THF. After drying at 140 °C under vacuum for 5 h, black solid was obtained (241 mg, 39 %).

IR (ATR)  $\tilde{\nu}$  /  $\text{cm}^{-1}$ : 3342, 1587, 1512, 1434, 1391, 1346, 829.

$^{13}\text{C}$  CP/MAS NMR (400 MHz)  $\delta$  / ppm: 194.7, 151.9, 141.5, 129.8, 114.2.

Elemental Analysis: 74.64 %C (calc. 80.27), 11.23 %N (calc. 12.65).

### Synthesis of AZO-B-P11

AZO-B-P11 was synthesized by the similar procedure described in the literature.<sup>3</sup> TNPB (500 mg, 1.13 mmol), 4,4'-diaminodiphenyl sulfide (367 mg, 1.70 mmol), DMF (50 mL) and KOH (634 mg, 11.3 mmol) were added in double-necked flask and heated to reflux under  $\text{N}_2$  atmosphere. After 24 h, the reaction mixture was cooled to room temperature, poured in 300 mL of distilled water and stirred for 1 h. The reaction mixture was filtered off and washed with hot distilled water, acetone and THF. After drying at 140 °C under vacuum for 5 h, black solid was obtained (197 mg, yield 31 %).

IR (ATR)  $\tilde{\nu}$  /  $\text{cm}^{-1}$ : 3364, 1590, 1510, 1444, 1391, 1341, 840.

$^{13}\text{C}$  CP/MAS NMR (400 MHz)  $\delta$  / ppm: 151.5, 145.9, 139.6, 127.5, 124.1, 116.3.

Elemental Analysis: 71.77 %C (calc. 77.54), 10.58 %N (calc. 12.56).

### Synthesis of AZO-T-P12

AZO-T-P12 was synthesized by the similar procedure described in the literature.<sup>3</sup> TNPT (500 mg, 1.13 mmol), benzidine (310 mg, 1.70 mmol), DMF (50 mL) and KOH (634 mg, 11.3 mmol) were added in double-necked flask and heated to reflux under  $\text{N}_2$  atmosphere. After 24 h, the reaction mixture was cooled to room temperature, poured in 300 mL of distilled water and stirred for 1 h. The reaction mixture was filtered off and washed with hot distilled water, acetone and THF. After drying at 140 °C under vacuum for 5 h, black solid was obtained (410 mg, yield 69 %).

IR (ATR)  $\tilde{\nu}$  /  $\text{cm}^{-1}$ : 3368, 1582, 1503, 1494, 1435, 1407, 1358, 812.

$^{13}\text{C}$  CP/MAS NMR (400 MHz)  $\delta$  / ppm: 169.6, 154.0, 137.1, 128.7, 122.5, 114.9.

Elemental Analysis: 70.36 %C (calc. 74.99), 20.63 %N (calc. 21.20).

### Synthesis of AZO-T-P13

AZO-T-P13 was synthesized by the similar procedure described in the literature.<sup>3</sup> TNPT (500 mg, 1.13 mmol), 4,4'-diaminodiphenylmethane (330 mg, 1.70 mmol), DMF (50 mL) and KOH (634 mg, 11.3 mmol) were added in double-necked flask and heated to reflux under  $\text{N}_2$  atmosphere. After 24 h, the reaction mixture was cooled to room temperature, poured in 300 mL of distilled water and stirred for 1 h. The reaction mixture was filtered off

and washed with hot distilled water, acetone and THF. After drying at 140 °C under vacuum for 5 h, black solid was obtained (321 mg, yield 52 %).

IR (ATR)  $\tilde{\nu}$  /  $\text{cm}^{-1}$ : 3344, 1582, 1495, 1435, 1407, 1355, 811.

$^{13}\text{C}$  CP/MAS NMR (400 MHz)  $\delta$  / ppm: 170.1, 154.0, 145.6, 138.2, 129.6, 122.6, 115.5, 40.2.

Elemental Analysis: 67.72 %C (calc. 75.26), 16.73 %N (calc. 20.65).

### Synthesis of AZO-T-P14

AZO-T-P14 was synthesized by the similar procedure described in the literature.<sup>3</sup> TNPT (500 mg, 1.13 mmol), 4,4'-oxydianiline (340 mg, 1.70 mmol), DMF (50 mL) and KOH (634 mg, 11.3 mmol) were added in double-necked flask and heated to reflux under  $\text{N}_2$  atmosphere. After 24 h, the reaction mixture was cooled to room temperature, poured in 300 mL of distilled water and stirred for 1 h. The reaction mixture was filtered off and washed with hot distilled water, acetone and THF. After drying at 140 °C under vacuum for 5 h, black solid was obtained (334 mg, yield 54 %).

IR (ATR)  $\tilde{\nu}$  /  $\text{cm}^{-1}$ : 3384, 1601, 1493, 1409, 1336, 824.

$^{13}\text{C}$  CP/MAS NMR (400 MHz)  $\delta$  / ppm: 169.5, 150.4, 139.7, 130.2, 123.4, 116.9.

Elemental Analysis: 71.59 %C (calc. 72.78), 18.03 %N (calc. 20.58).

## 2. FT-IR spectra

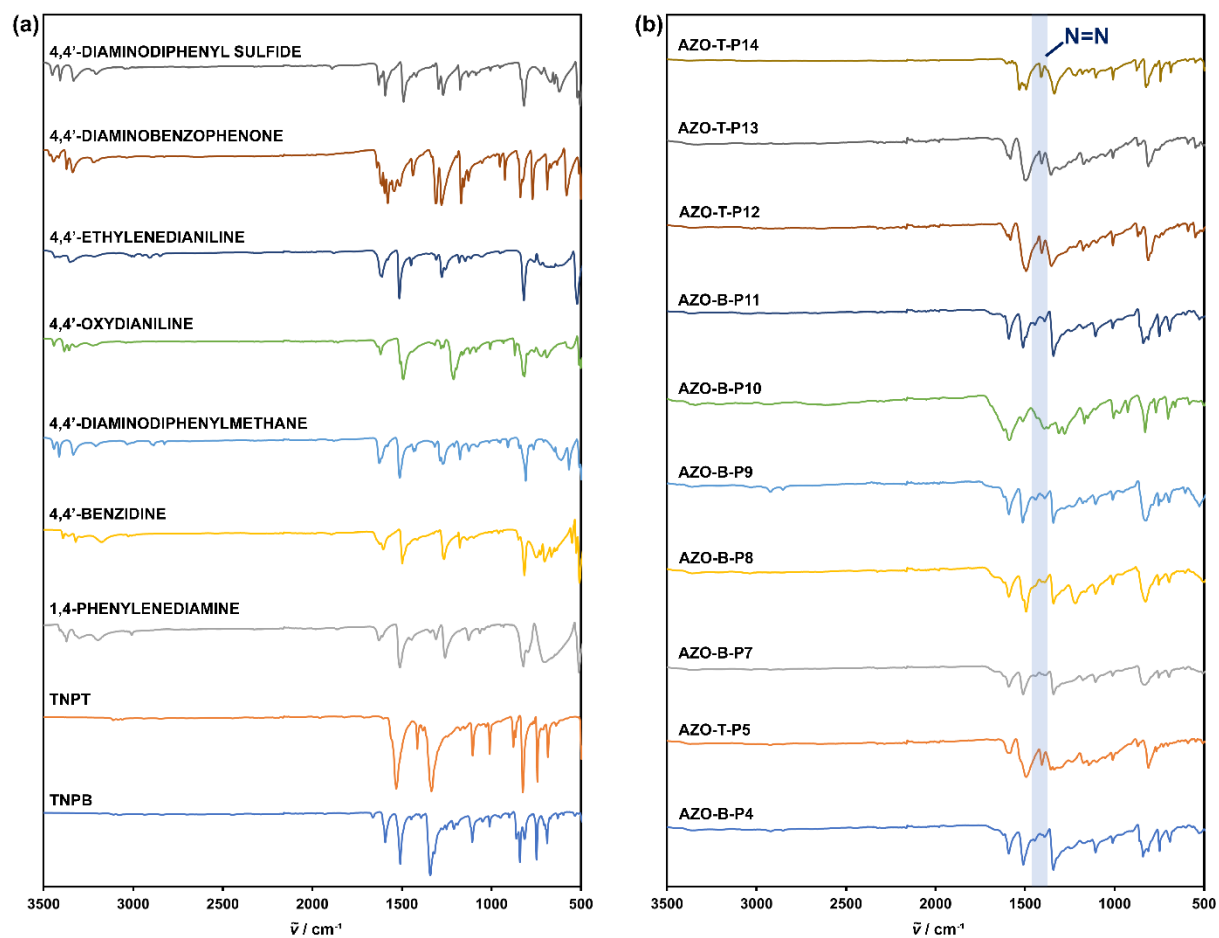

**Figure S1.** FT-IR spectra of (a) starting aromatic nitro and amino monomers and (b) azo-bridged polymers.

### 3. $^{13}\text{C}$ CP/MAS NMR spectra

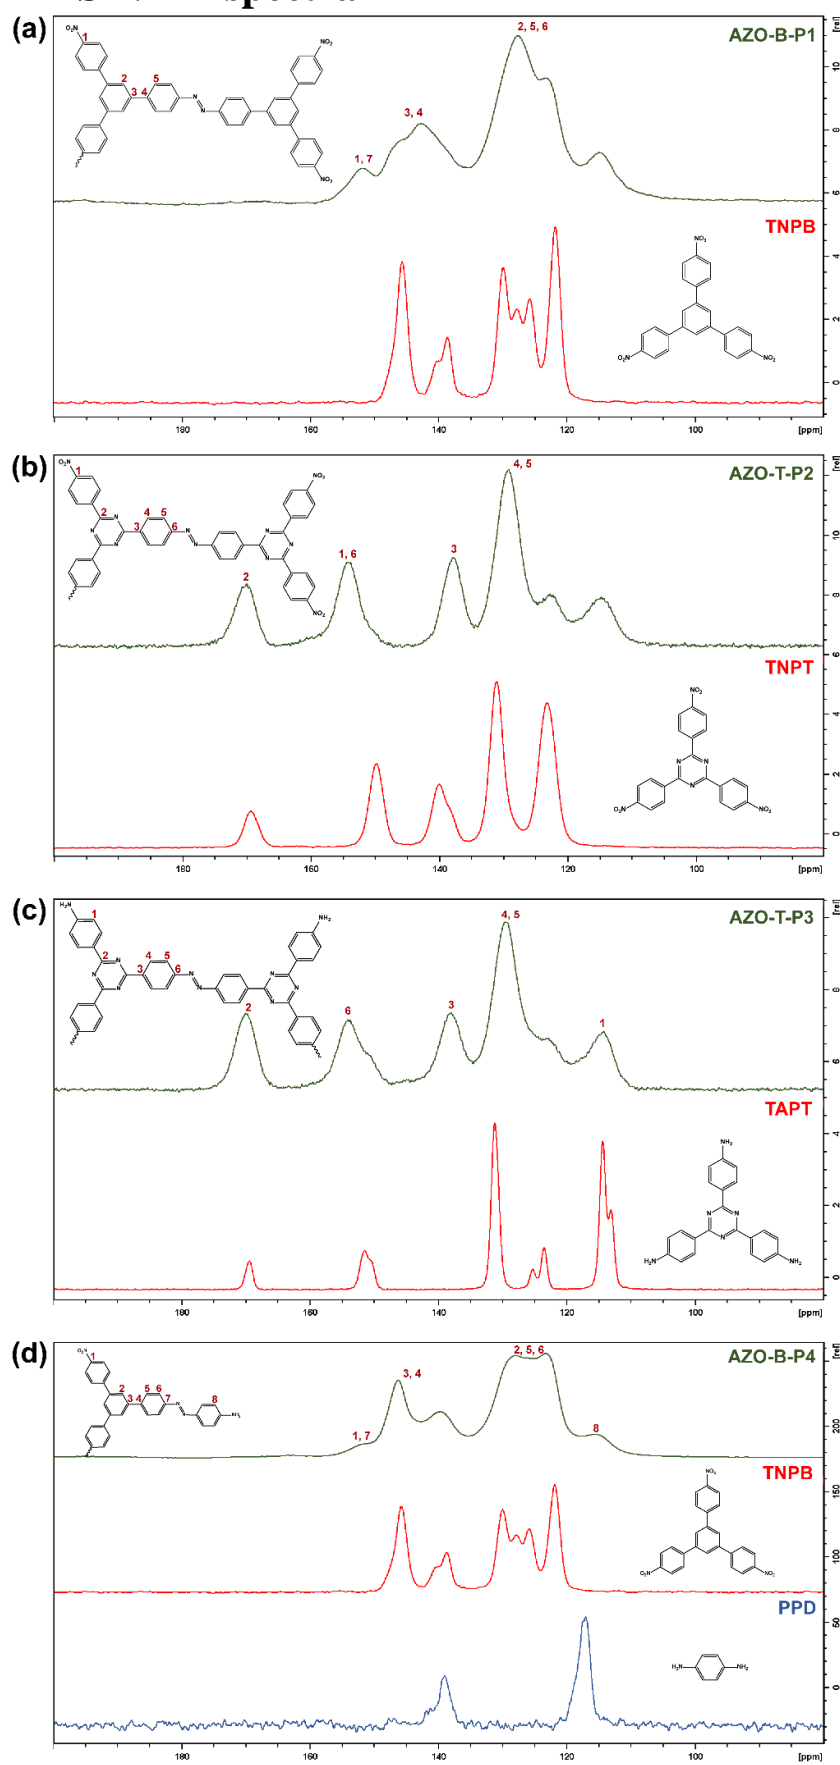

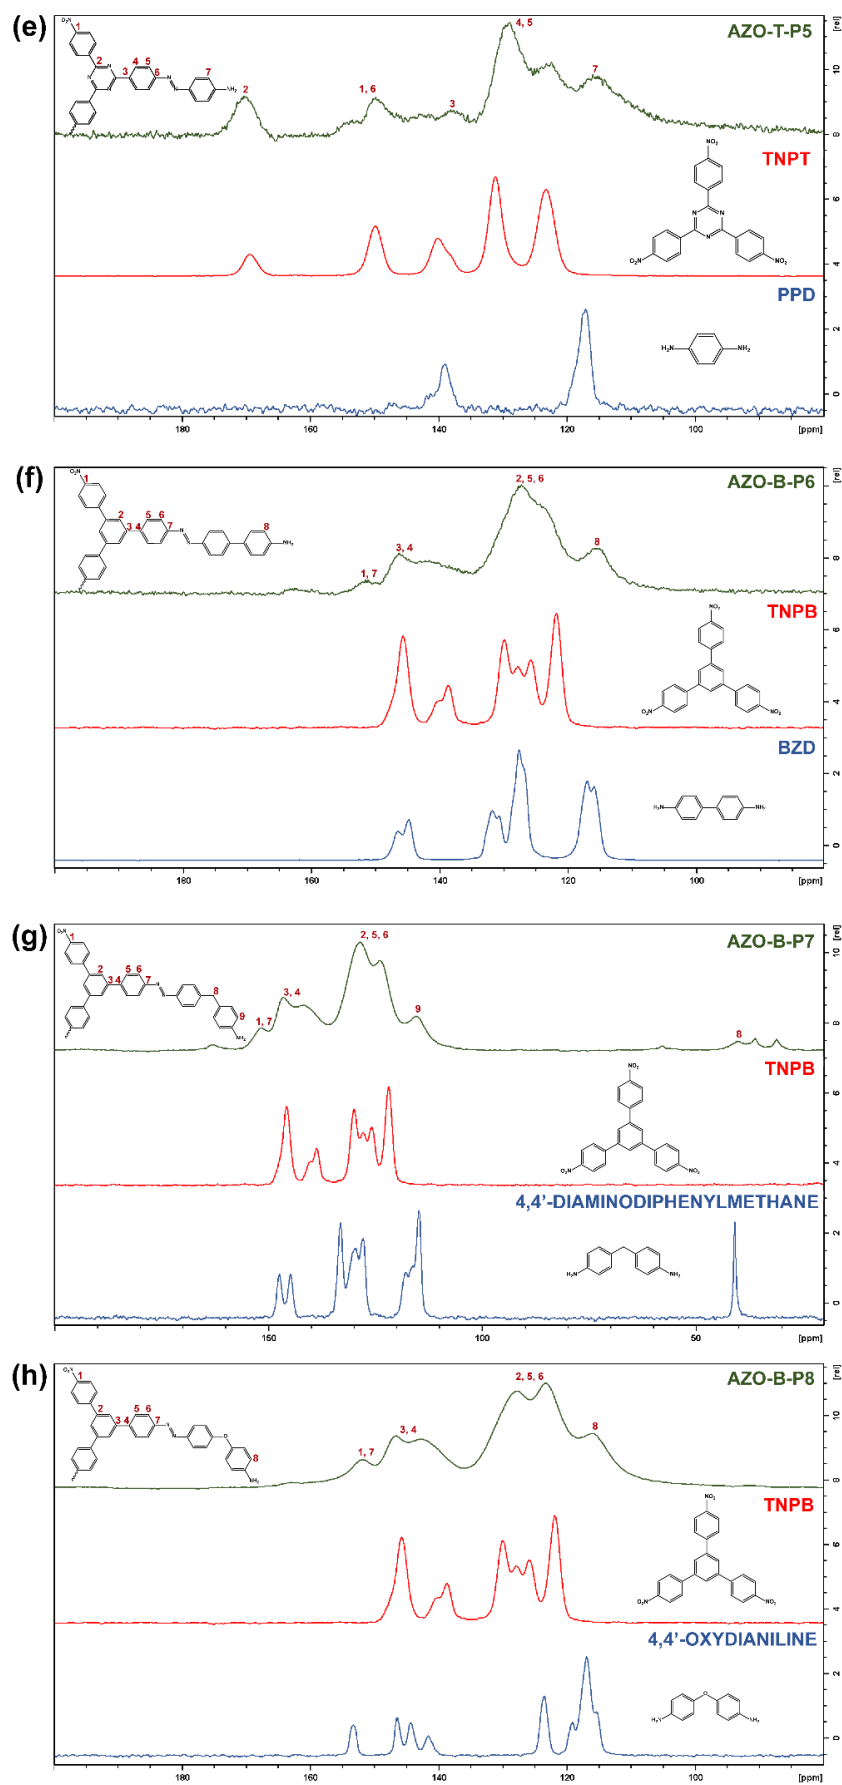

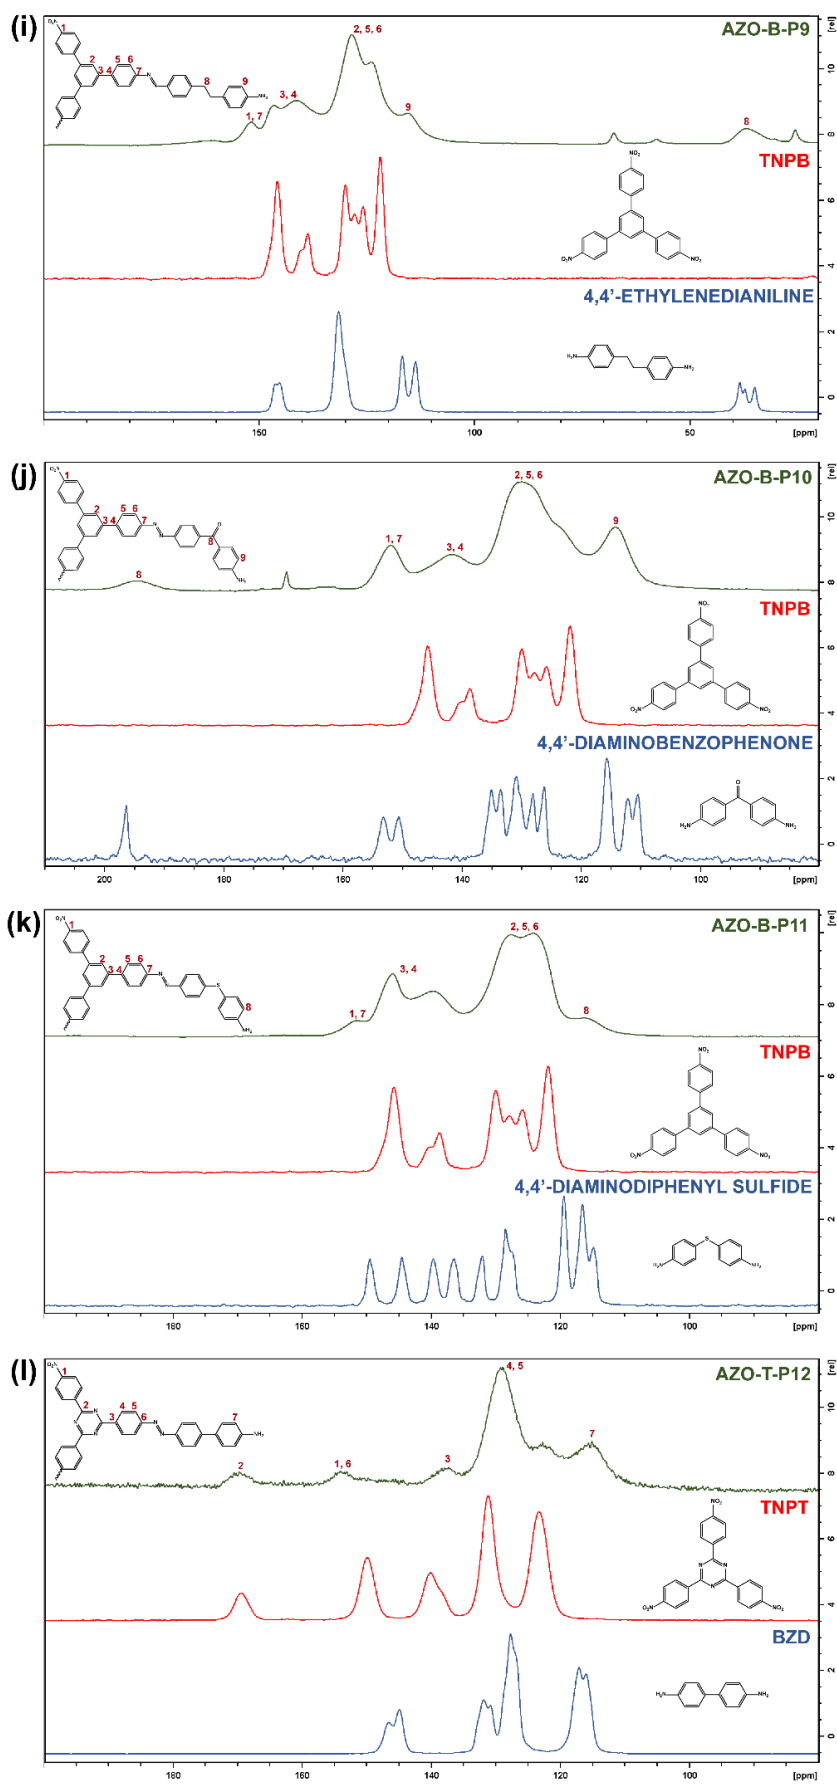

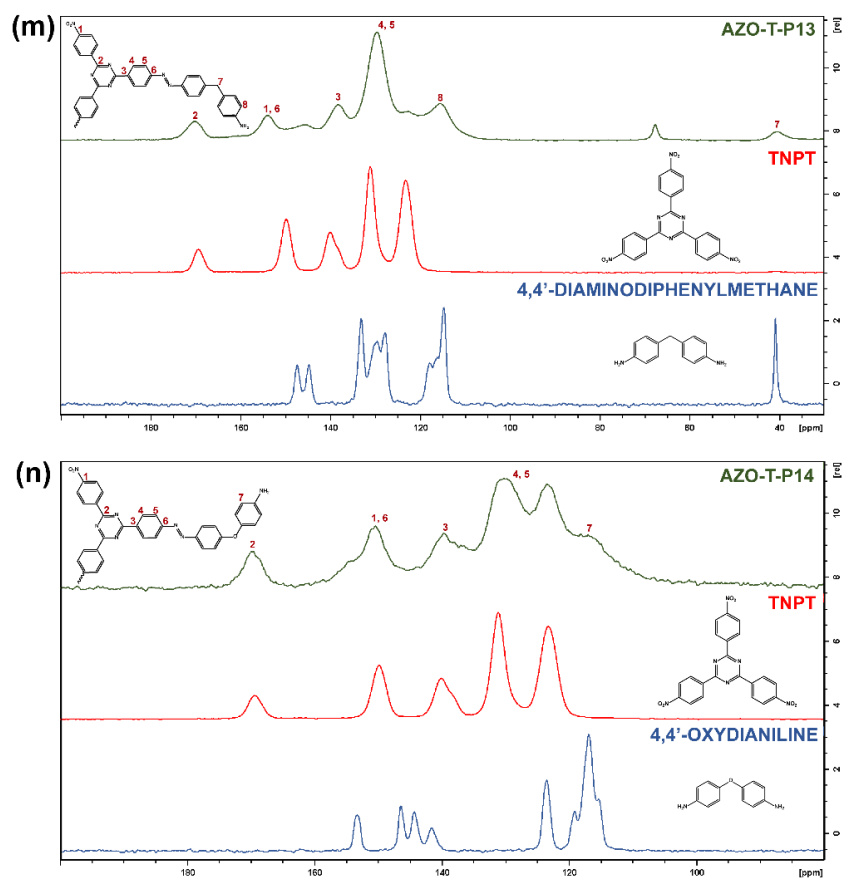

**Figure S2.** Comparison of  $^{13}\text{C}$  CP/MAS NMR spectra of azo-bridged polymers and corresponding starting aromatic nitro and amino monomers.

## 4. Powder X-ray diffraction

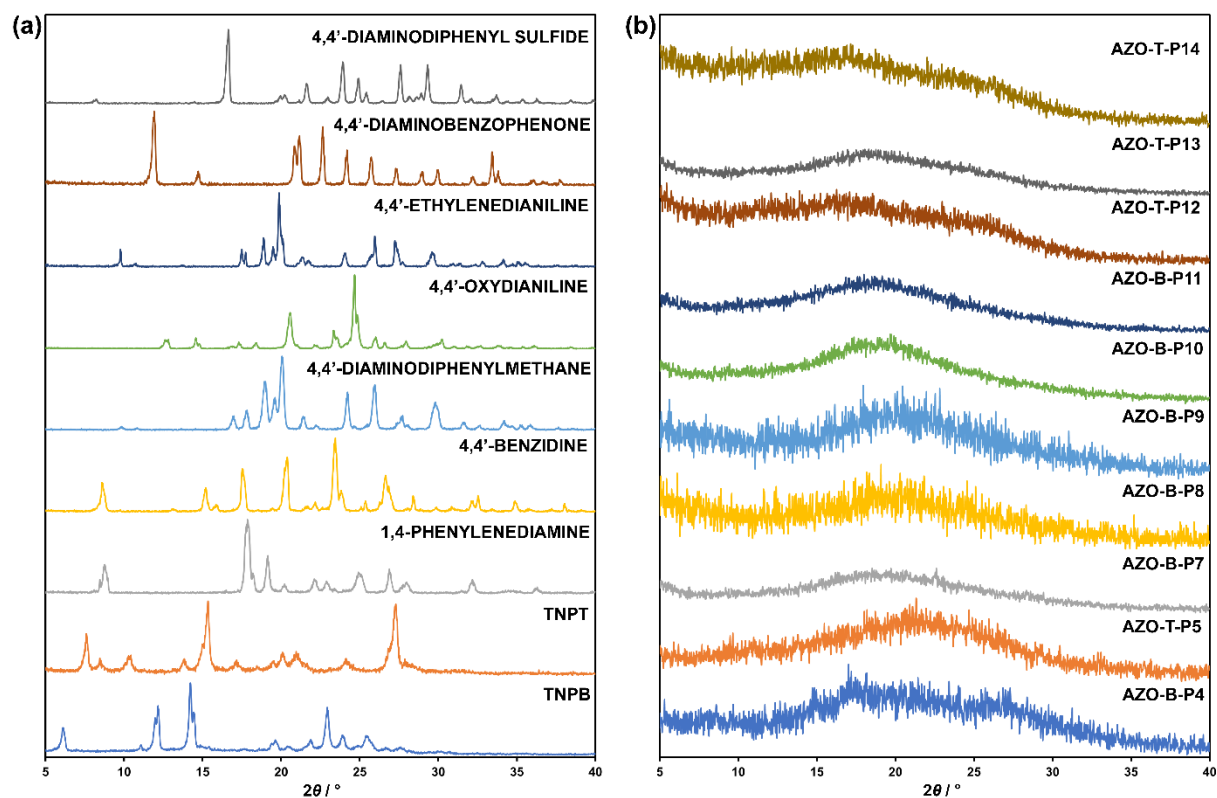

**Figure S3.** PXRD diffractograms of (a) starting aromatic nitro and amino monomers and (b) azo-bridged polymers.

## **5. Thermogravimetric analysis**

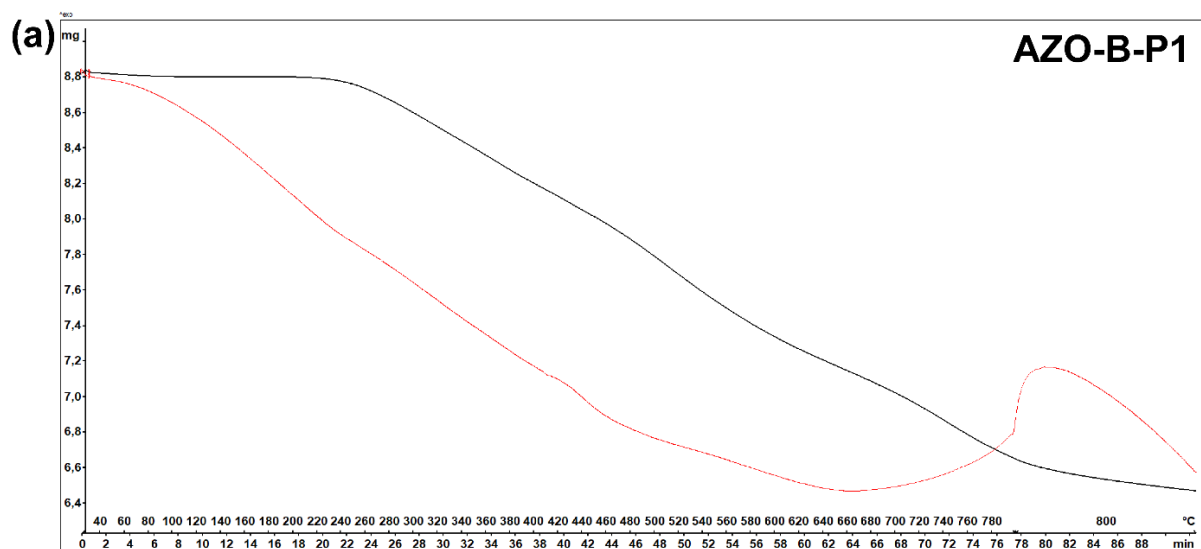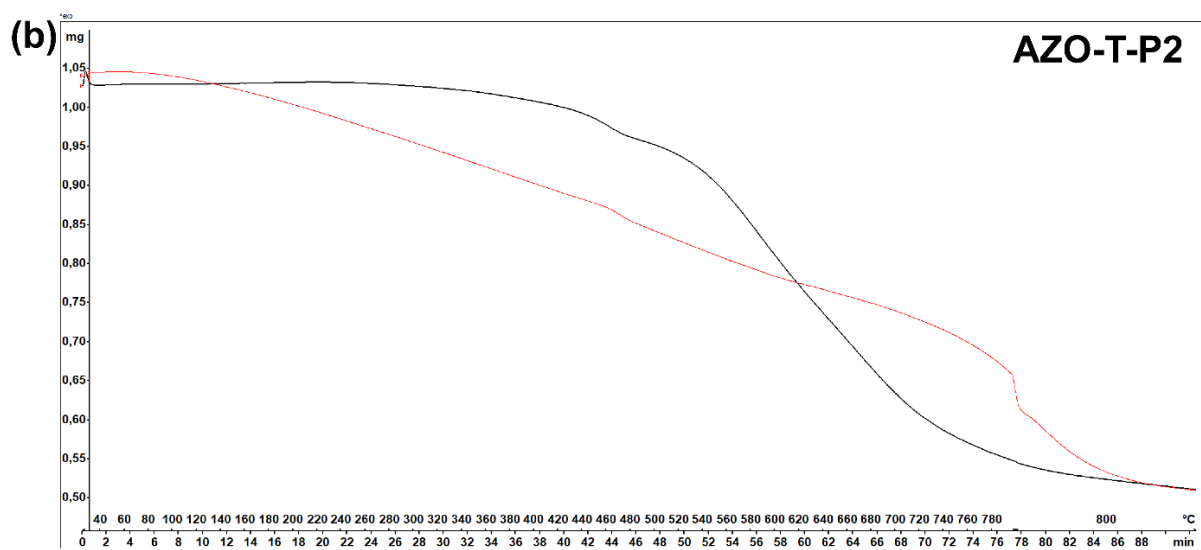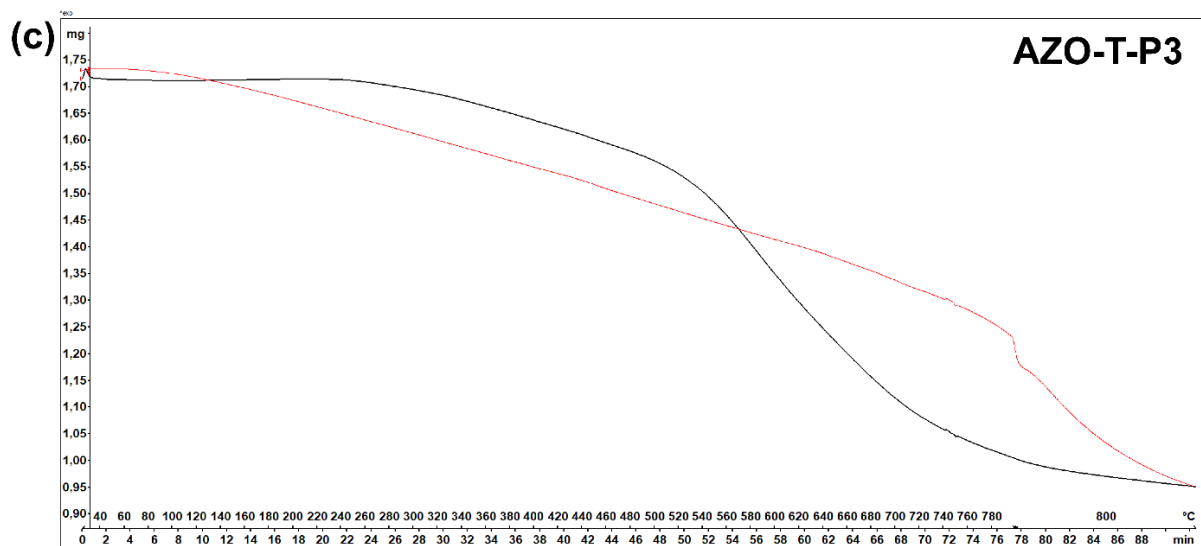

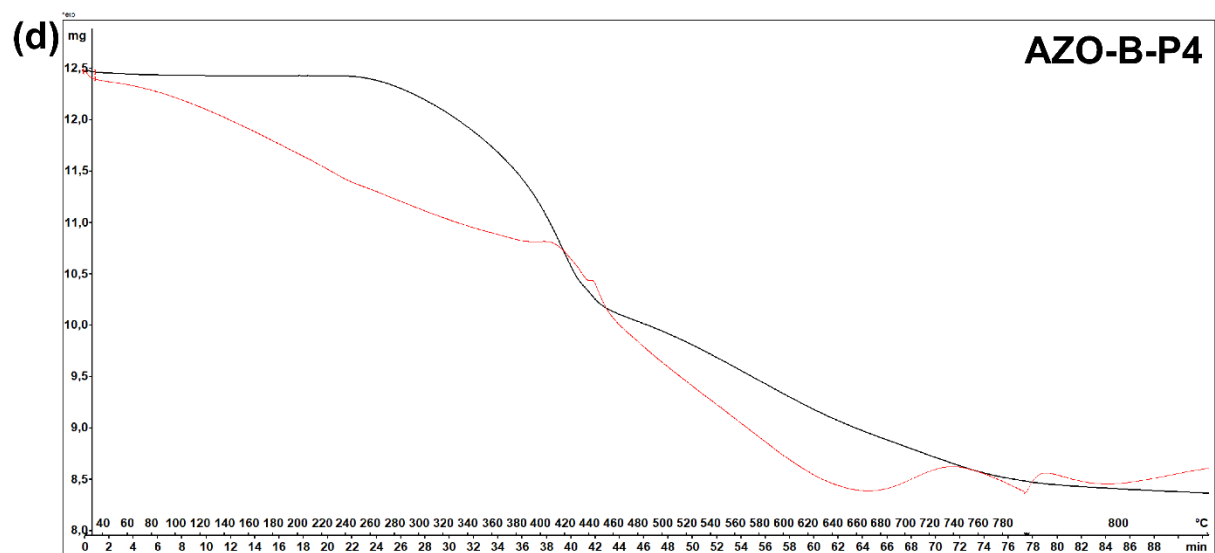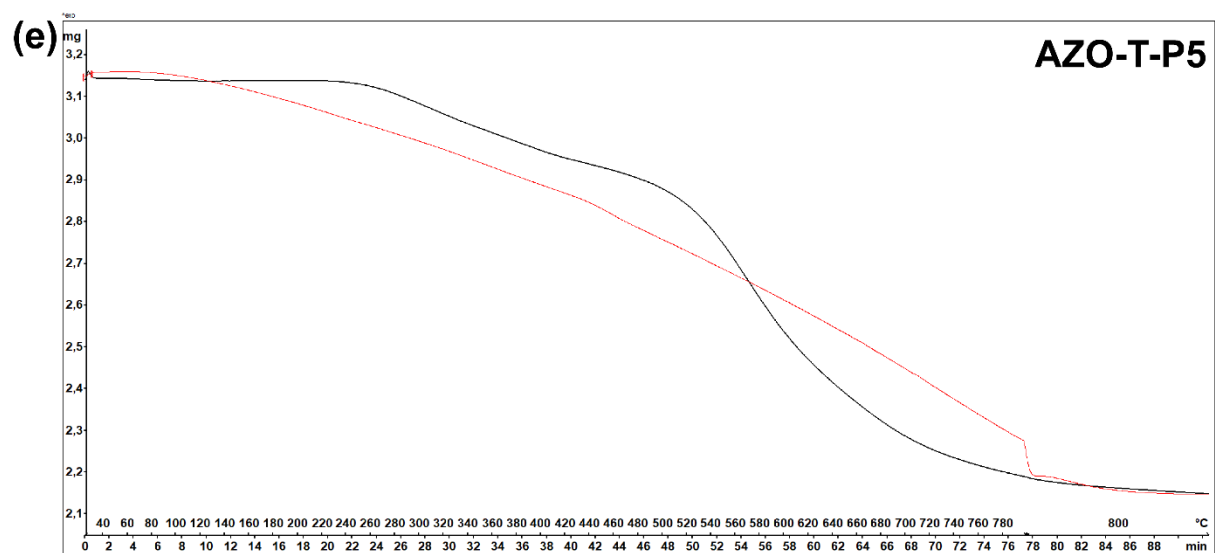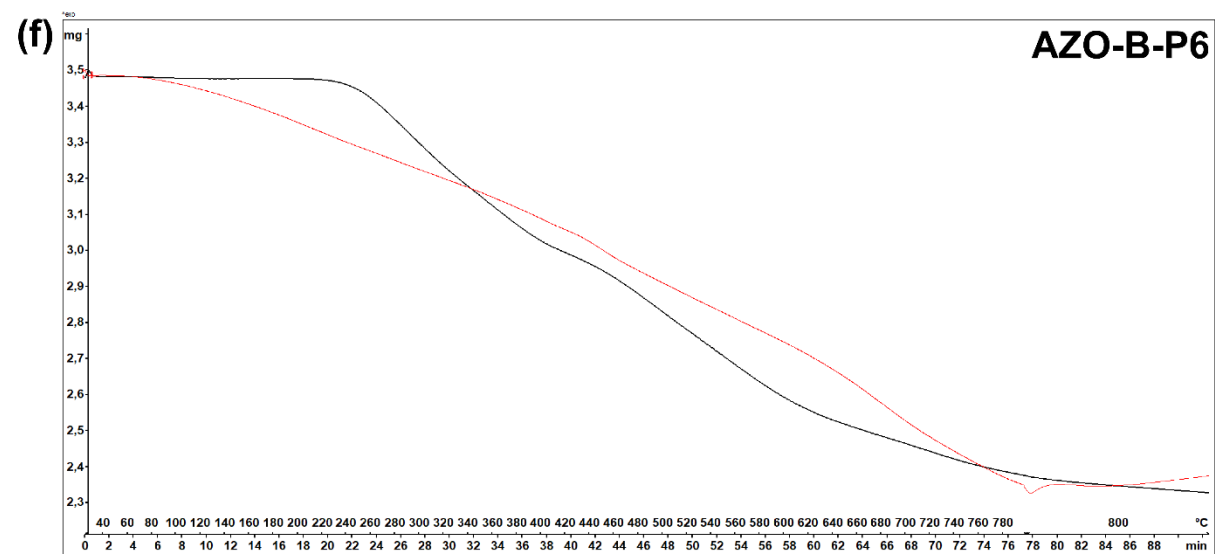

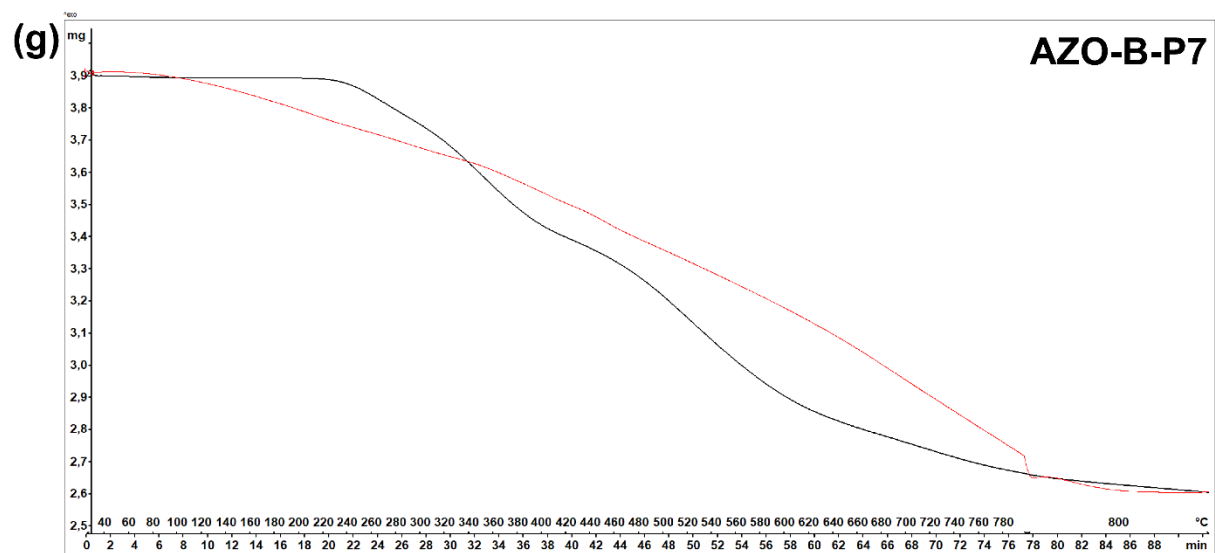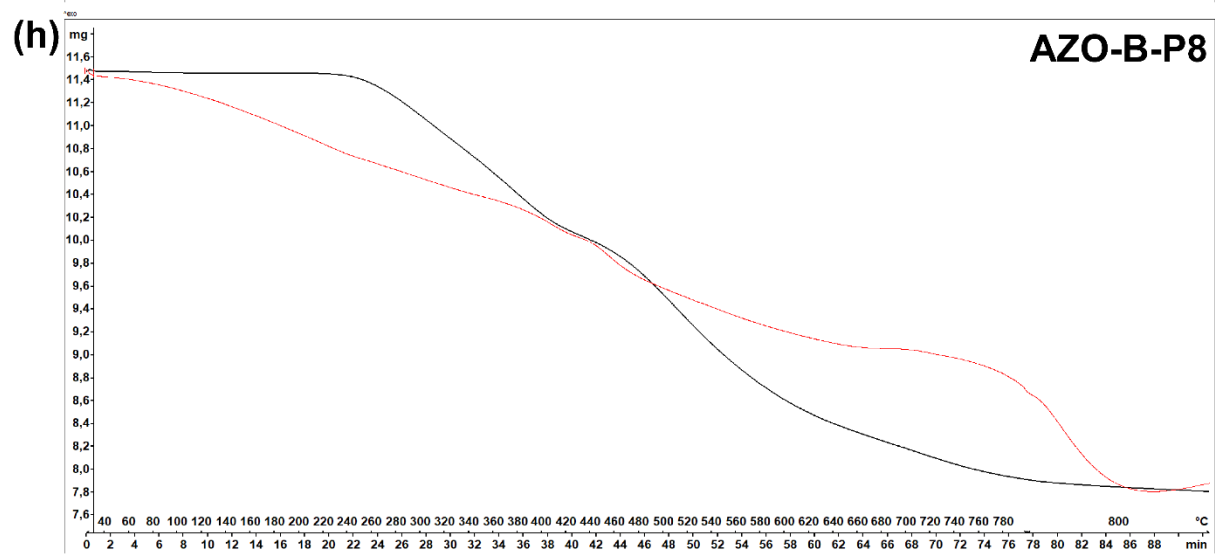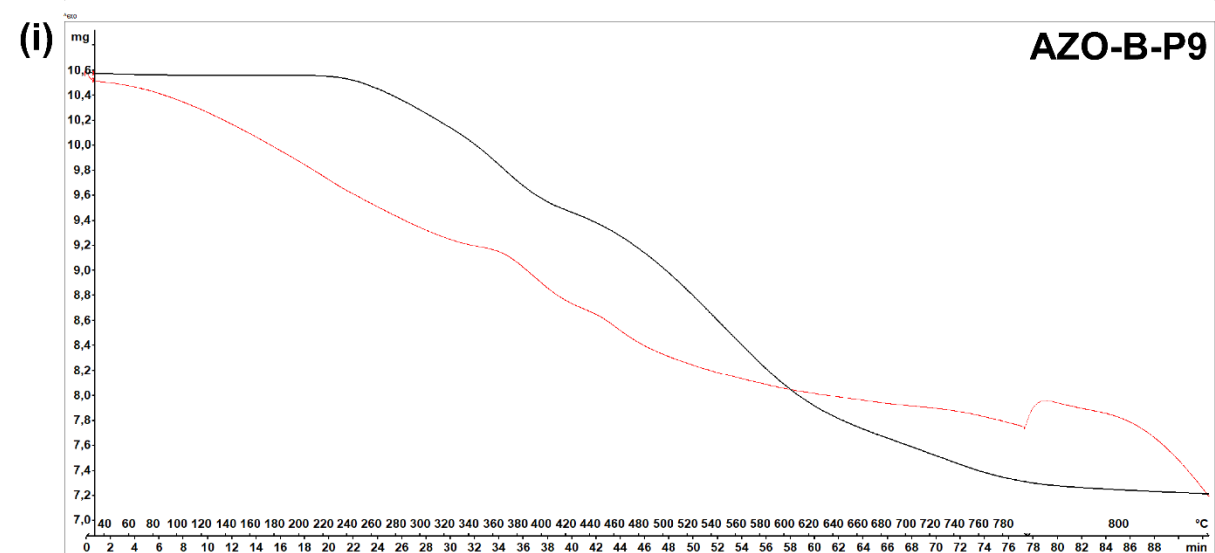

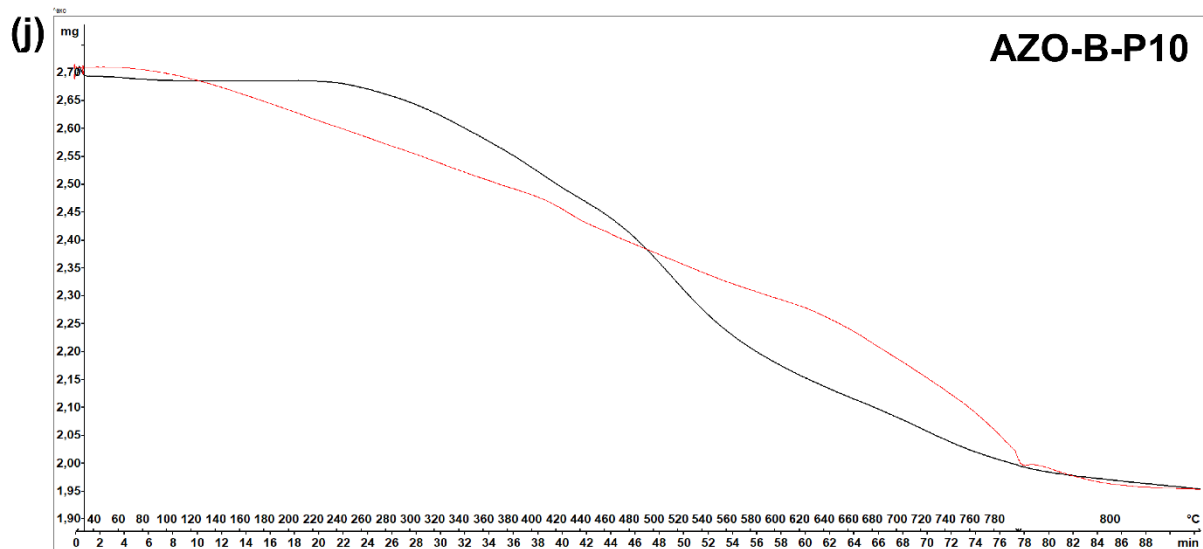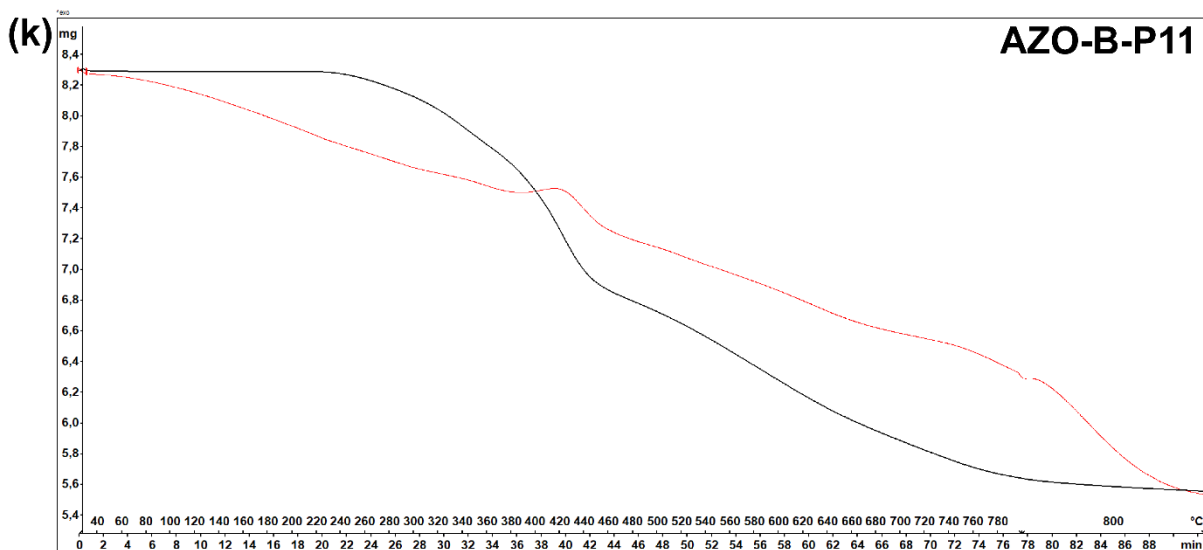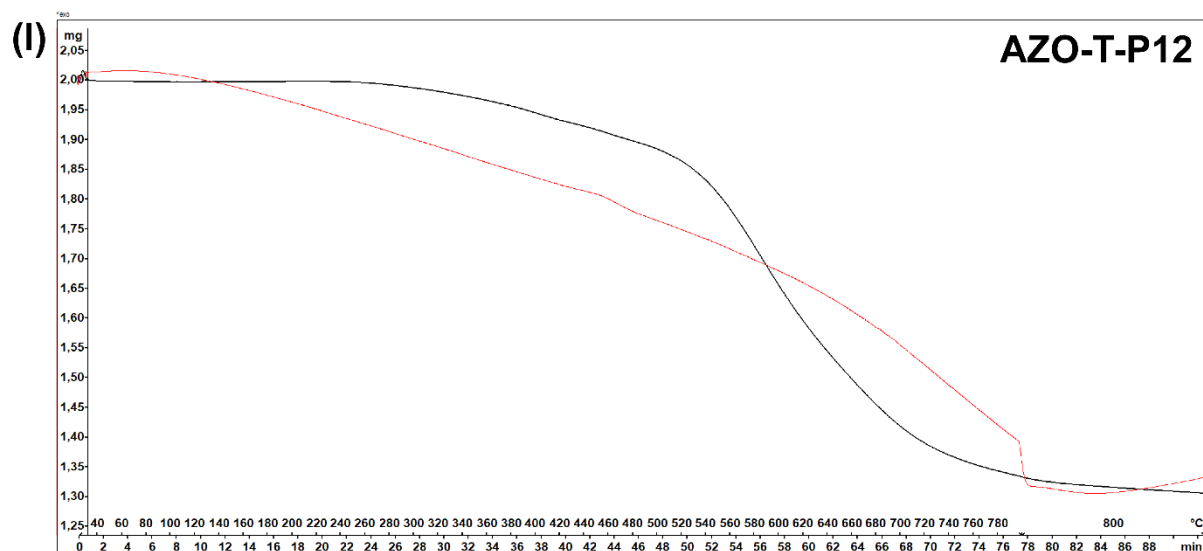

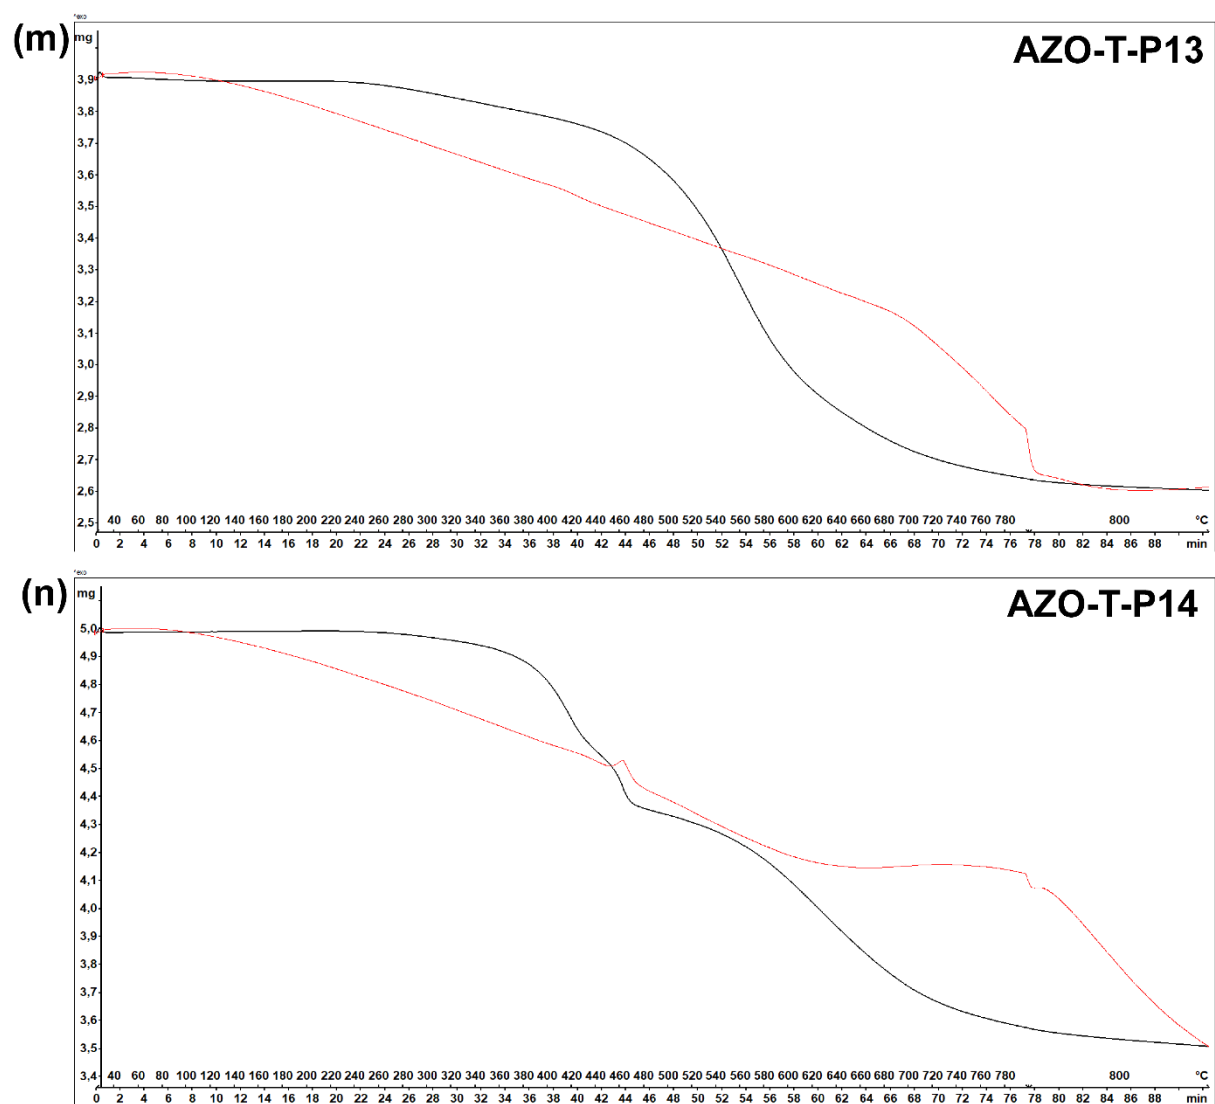

**Figure S4.** TGA (black) and DSC (red) curves of azo-bridged polymers.

## 6. Computational studies of azo-bridged polymers

**Table S1.** Unit cell parameters ( $a$ ,  $b$ ,  $c$ ,  $\alpha$ ,  $\beta$  and  $\gamma$ ) of the optimized geometries (PBE-D3/pob-TZVP-rev2) of benzene-based (AZO-B) and triazine-based (AZO-T) model compounds.

|             | Compound  | Space group | CRYSTAL17 label | $a / \text{\AA}$ | $b / \text{\AA}$ | $c / \text{\AA}$ | $\alpha / ^\circ$ | $\beta / ^\circ$ | $\gamma / ^\circ$ |
|-------------|-----------|-------------|-----------------|------------------|------------------|------------------|-------------------|------------------|-------------------|
| AA stacking | AZO-B     | $P \bar{3}$ | 147             | 25.6247          | 25.6247          | 3.5830           | 90                | 90               | 120               |
|             | AZO-B-PPD | $P \bar{3}$ | 147             | 36.1836          | 36.1836          | 3.5759           | 90                | 90               | 120               |
|             | AZO-B-BZD | $P \bar{3}$ | 143             | 43.3587          | 43.3587          | 3.5786           | 90                | 90               | 120               |
|             | AZO-T     | $P \bar{3}$ | 147             | 25.2081          | 25.2081          | 3.5170           | 90                | 90               | 120               |
|             | AZO-T-PPD | $P \bar{3}$ | 147             | 35.6570          | 35.6570          | 3.5265           | 90                | 90               | 120               |
|             | AZO-T-BZD | $P \bar{3}$ | 143             | 42.7213          | 42.7213          | 3.5440           | 90                | 90               | 120               |

**Table S2.** Calculated framework properties of the AA stacked 2D layered compounds (framework density, available pore volume and average surface area) and the size of the simulation box used in the GCMC calculations.

|             | Compound  | GCMC simulation box | Framework density, g/cm <sup>3</sup> | Available pore volume, cm <sup>3</sup> /g | Average surface area, m <sup>2</sup> /g |
|-------------|-----------|---------------------|--------------------------------------|-------------------------------------------|-----------------------------------------|
| AA stacking | AZO-B     | 2×2×8               | 0.563                                | 1.140                                     | 1957                                    |
|             | AZO-B-PPD | 2×2×8               | 0.411                                | 1.794                                     | 2237                                    |
|             | AZO-B-BZD | 2×2×8               | 0.351                                | 2.203                                     | 2306                                    |
|             | AZO-T     | 2×2×8               | 0.598                                | 1.031                                     | 1828                                    |
|             | AZO-T-PPD | 2×2×8               | 0.431                                | 1.671                                     | 2127                                    |
|             | AZO-T-BZD | 2×2×8               | 0.367                                | 2.075                                     | 2207                                    |

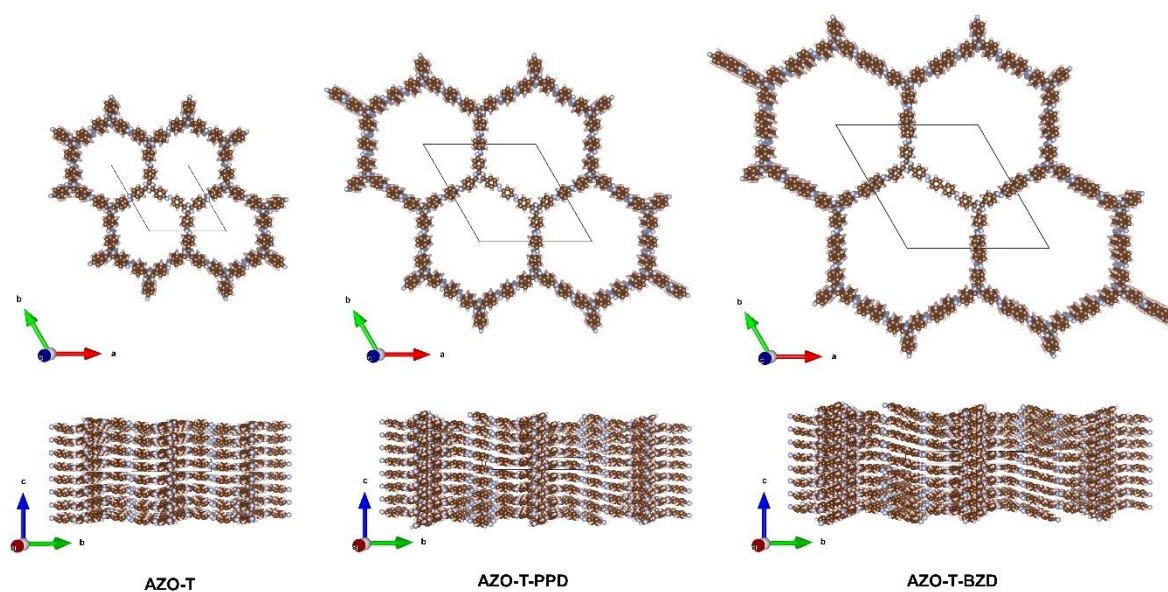

**Figure S5.** Optimized geometries (PBE-D3/pob2-TZVP-rev2) of AZO-T, AZO-T-PPD and AZO-T-BZD with eclipsed (AA-stacked) geometries of 2D layers shown along the  $c$  and  $a$  unit cell vectors). Unit cells are represented by grey lines.

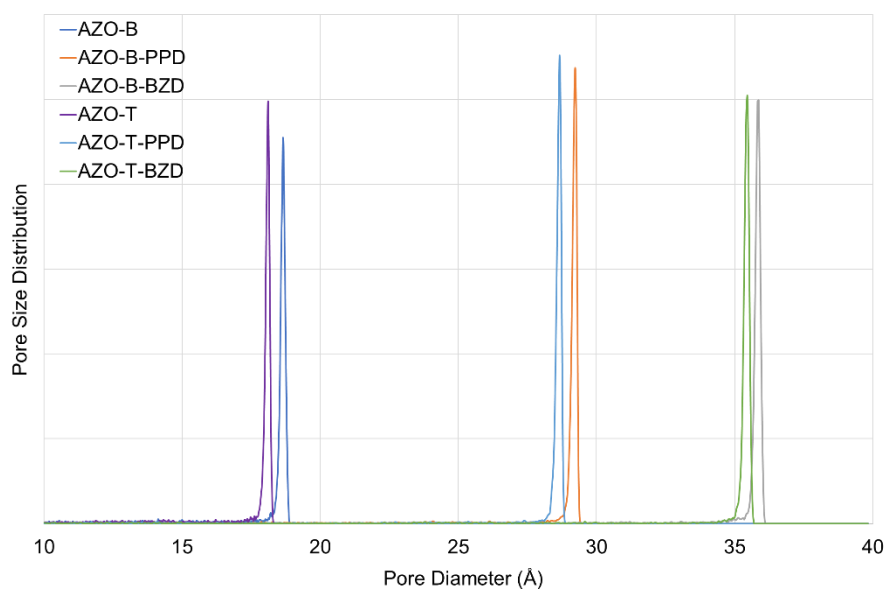

**Figure S6.** Pores size distribution of AA stacked configurations.

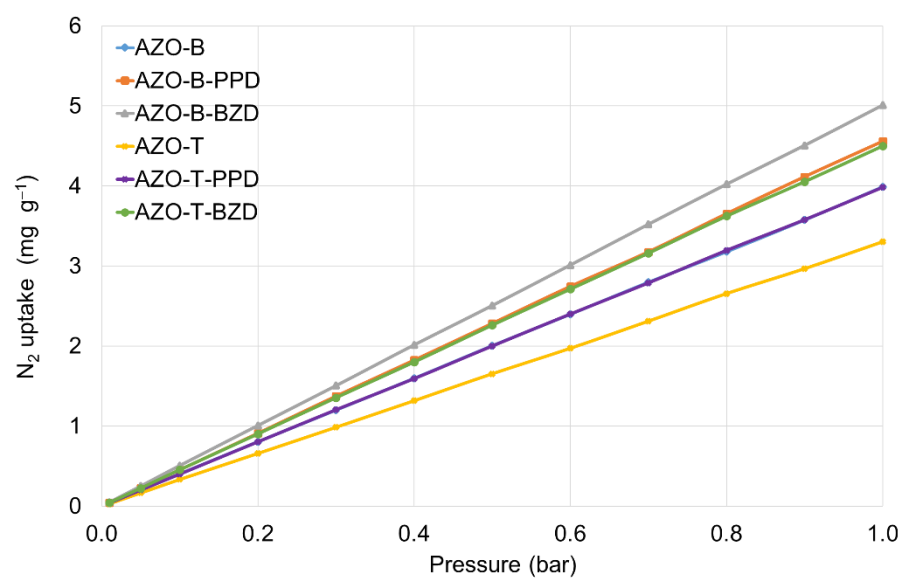

**Figure S7.**  $N_2$  adsorption isotherms simulated at 298 K.
